# Supplementary material for: High aspect ratio rhodium nanostructures for tunable electrocatalytic performance
Source: Royal Society of Chemistry journal article supplement (doi:10.1039/c3cp50414j), 2013-01-01
Supplement: c3cp50414j.pdf [file c3cp50414j.pdf]

### **Supporting Information**

## **High Aspect Ratio Rhodium Nanostructures for Tunable Electrocatalytic Performance**

**Bhaskar R. Sathe\***

Department of Chemistry, Dr. Babasaheb Ambedkar Marathwada University Aurangabad- 431 004,  
India

Fax: +91 240 2400291 Phone No. +91 240 2403313

E-mail: [bhaskarsathe@gmail.com](mailto:bhaskarsathe@gmail.com)

---

### **SI-I: Transmission Electron Microscopy (TEM) of Single Nanoneedle and Nanorod:**

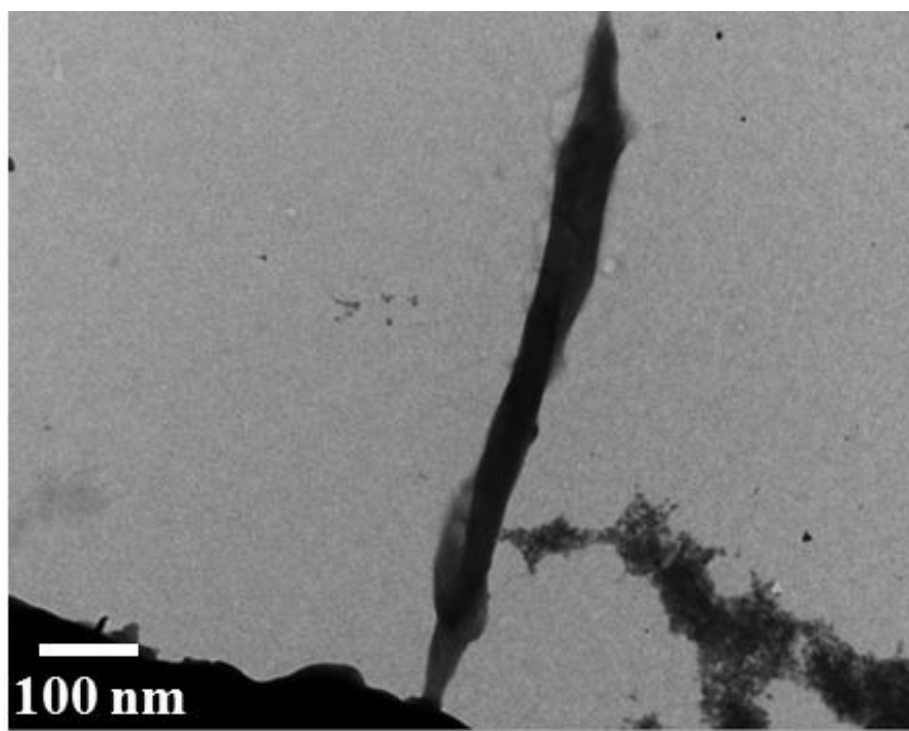

**Fig. S1** TEM image of single nanoneedle (Rh-TDA) having the length of  $\sim 1 \mu\text{m}$  and thickness of  $\sim 100 \text{ nm}$ .

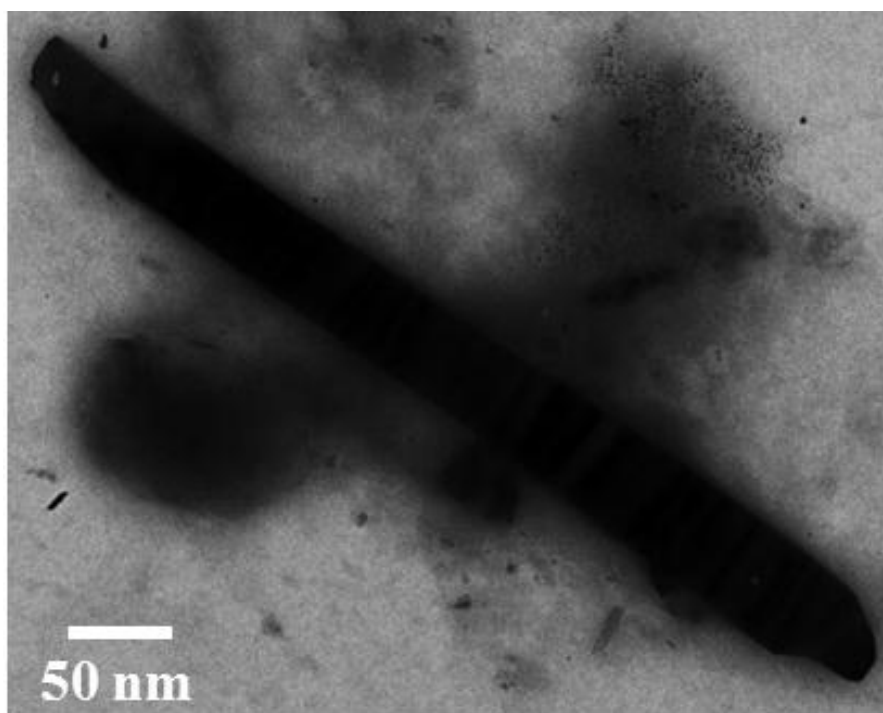

**Fig. S2** TEM image of single nanorod (Rh-HTA) having the length of  $\sim 1\ \mu\text{m}$  and thickness of  $\sim 60\ \text{nm}$ .

#### **SI-II: Furrier Transform Infra Red Spectroscopy:**

Figure S3, shows a comparison of the FTIR spectra AA before and after capping with Rh. Interestingly, a comparison of these spectra reveals the disappearance of four bands in the range of  $3300\text{-}3600\ \text{cm}^{-1}$  for the nanoparticle (Rh-AA) which corresponds to the symmetric -O-H stretching of AA skeleton. The capping molecules are linked through the -O-H groups to the Rh nanoparticles. More importantly, the appearance of additional strong bands in the range of  $500\ \text{cm}^{-1}$  in case of Rh-AA is attributed to the presence of Rh-O bond. The rest of the peaks remain common in both the cases corresponding to the capping molecular skeleton. Further, the functional involvement of the passivated TDA molecules on these nanoneedles (Rh-TDA) can be obtained from the FTIR analysis, as shown in Figure S4, where the C-H stretching region ( $2800\text{-}3000\ \text{cm}^{-1}$ ) is particularly informative about the orientation of methylene chains and Rh-TDA nanoneedles. In addition, Figure S4 reveals that the capping agent is intact except for the disappearance of a peak due to -N-H stretching at  $3320\ \text{cm}^{-1}$  after anchoring to Rh surface. The appearance of an additional strong band at  $812\ \text{cm}^{-1}$  is attributed to the presence of Rh-N bond. A few sharp bands near  $1030$  and  $1358\ \text{cm}^{-1}$ , which are absent in the spectra of TDA, could be ascribed to the coordinated N species. In addition, a broad band at  $2320\ \text{cm}^{-1}$  suggests the presence of N as a charged amine species ( $-\text{NH}^+$ ), indicating the involvement of electrostatic interactions, especially with the nanoparticle surface. Further, the functional involvement of the passivated HTA molecules on these nanoneedles (Rh-HTA) can be obtained from the FTIR analysis, as shown in Figure

S5, where the C-H stretching region ( $2800\text{--}3000\text{ cm}^{-1}$ ) is particularly informative about the orientation of methylene chains and Rh-HTA nanoneedles.

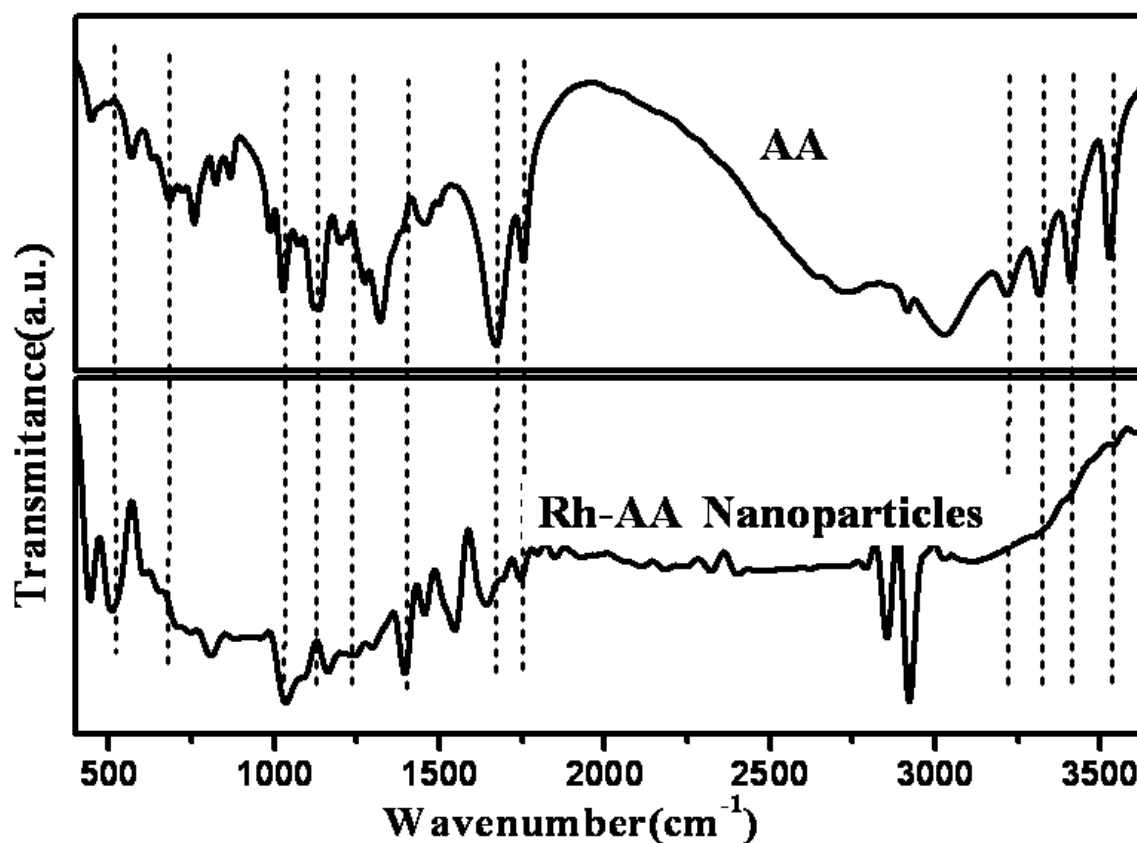

**Figure S3:** Superimposed FTIR spectra of AA molecules and Rh-AA nanoparticles performed in KBr matrix indicating strong peaks at  $500\text{ cm}^{-1}$  corresponding to Rh-O linkage of Rh-AA.

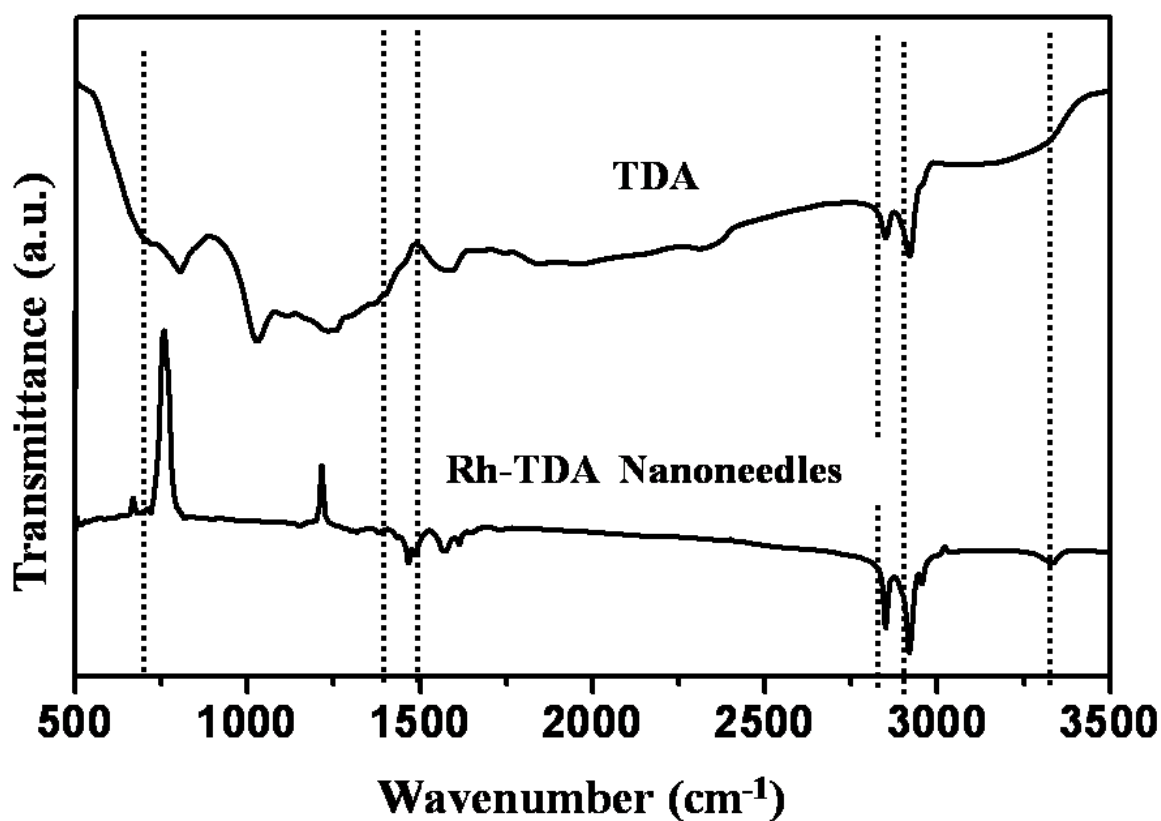

**Figure S4:** Superimposed FTIR spectra of TDA molecules and Rh-TDA nanoneedles performed in KBr matrix indicating strong peaks at 500  $\text{cm}^{-1}$  corresponding to Rh-N linkage of Rh-TDA.

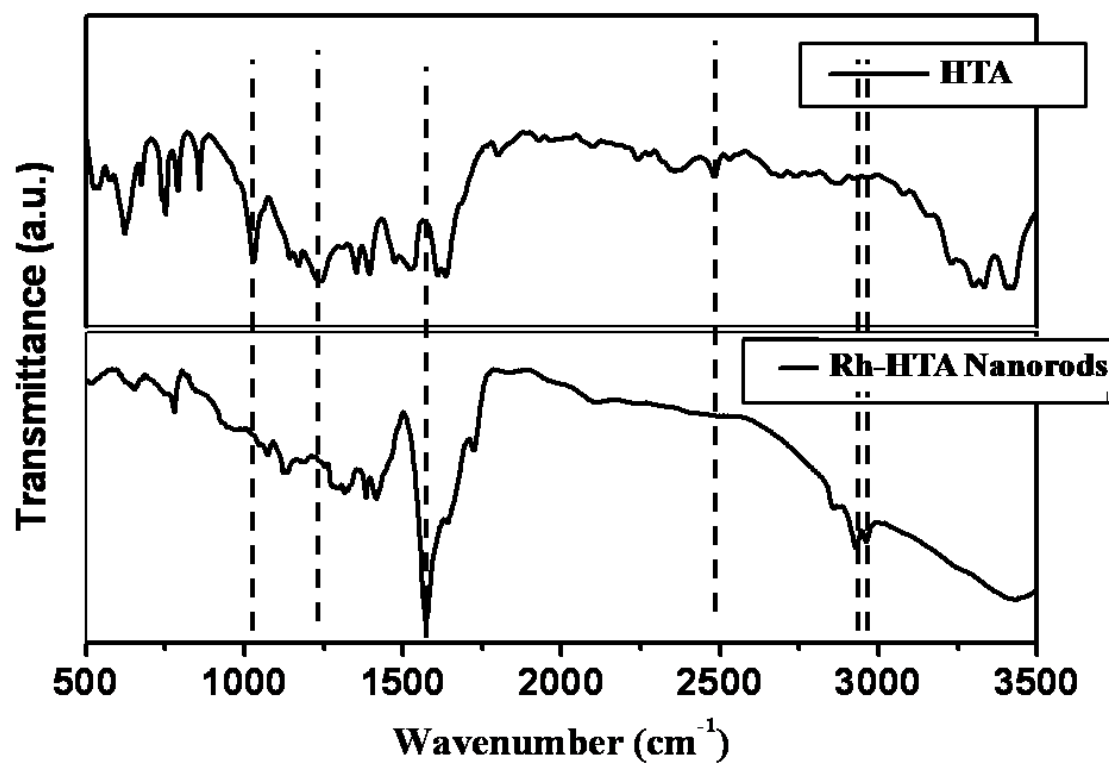

**Figure S5:** Superimposed FTIR spectra of HTA molecules and Rh-HTA nanorod bundles performed in KBr matrix indicating strong peaks at 600  $\text{cm}^{-1}$  corresponding to Rh-N linkage of Rh-HTA.

## References:

1. T. Shido, T. Okazaki and M. Ichikawa, *Cat. Lett.* **1993**, 20, 37-42.
2. S. Pinchas and I. Lauicht, *Infrared Spectra of Labeled Compounds*, Academic Press: London, **1971**; Chapter 9. *NIST Vibrational Spectroscopy Database* via. Internet: <http://srdata.nist.gov/vb> .
3. V. M. Frolov, L. P. Shuikina, K. K. Turisbekova, and G. N. Bondarenko *Catal. (Eng. Trans.)* **1994**, 35, 800-805.

## SI-III: Scanning Electron Spectroscopy (SEM) after electrochemical studies:

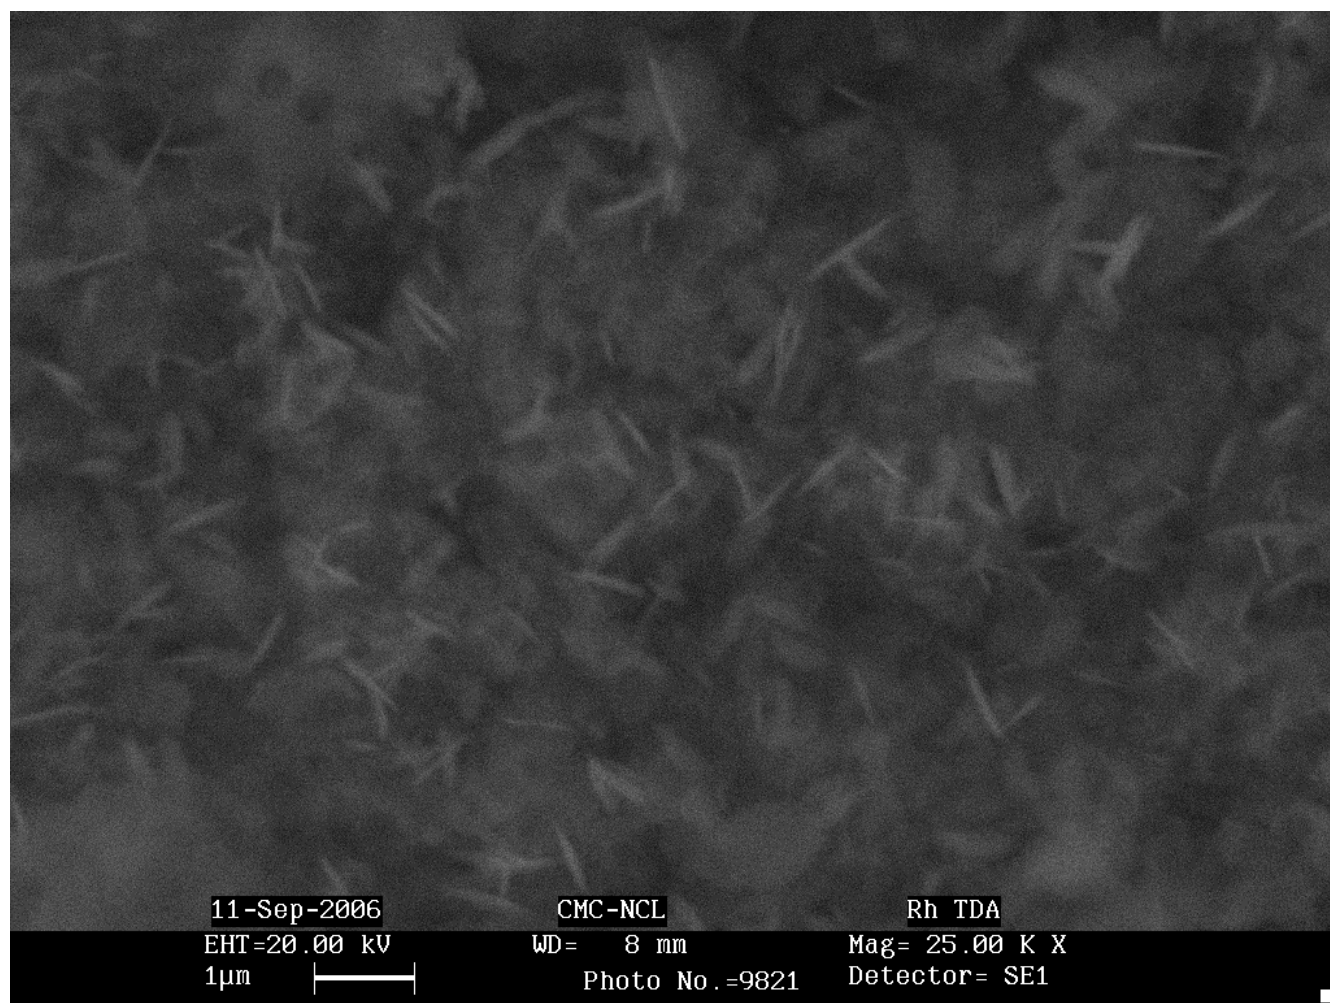

**Figure S6:** Scanning Electron microscopic image of nanoneedles (Rh- TDA) after electrocatalytic studies towards formic acid oxidation.



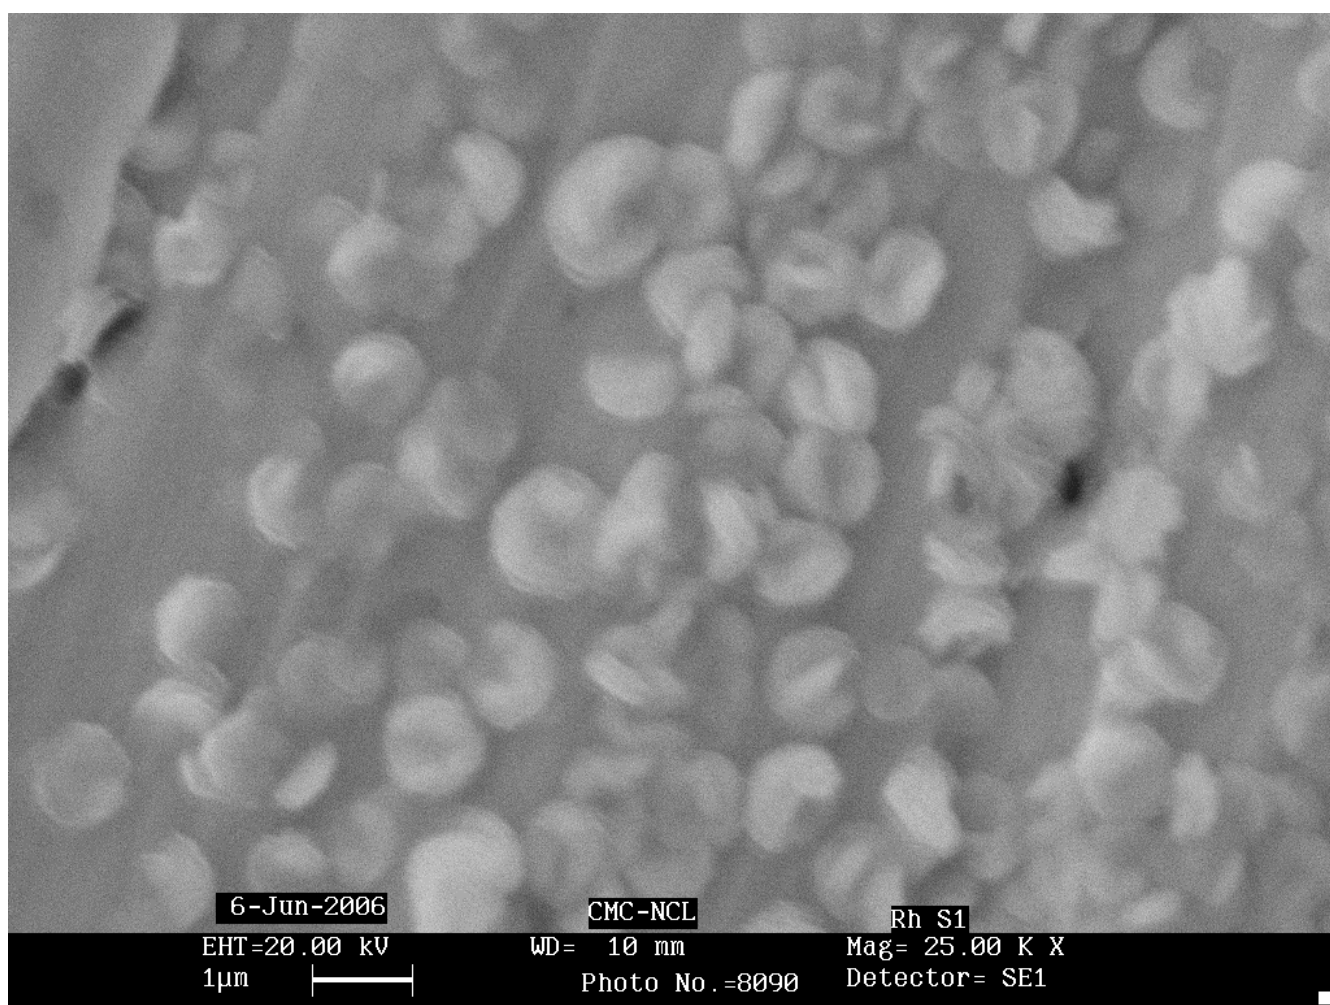

**Figure S7:** Scanning electron microscopic image of nanorod (Rh- HTA) bundles after electrocatalytic studies towards formic acid oxidation.
